# Supplementary material for: TRPM8 in the negative regulation of TNFα expression during cold stress
Source: PubMed Central journal article supplement (PMC5362914; doi:10.1038/srep45155), 2017-03-23
Supplement: srep45155-s1.pdf [file srep45155-s1.pdf]

# **TRPM8 in the negative regulation of TNF $\alpha$ expression during cold stress**

Xin-Pei Wang<sup>1†</sup>, Xuan Yu<sup>1†</sup>, Xiao-Jin Yan<sup>1</sup>, Fan Lei<sup>2</sup>, Yu-Shuang Chai<sup>1</sup>, Jing-Fei Jiang<sup>1</sup>, Zhi-Yi Yuan<sup>1</sup>, Dong-Ming Xing<sup>1</sup>, Li-Jun Du<sup>1\*</sup>

<sup>1</sup>MOE Key Laboratory of Protein Sciences, Laboratory of Molecular Pharmacology and Pharmaceutical Sciences, School of Life Sciences, Tsinghua University, Beijing 100084, China

<sup>2</sup>School of Pharmacology and Pharmaceutical Sciences, Tsinghua University, Beijing 100084, China

**† Equal in contribution**

**\* Correspondence should be addressed to**

MOE Key Laboratory of Protein Sciences,

Laboratory of Molecular Pharmacology and Pharmaceutical Sciences

School of Life Sciences

Tsinghua University,

Beijing 100084, China

Tel: +86-10-62796270

Email: [lijundu@mail.tsinghua.edu.cn](mailto:lijundu@mail.tsinghua.edu.cn)

Supplementary information includes:

Supplementary Figure S1-S11, Table S1 and S2.

**Supplementary information**  
**Figure S1**

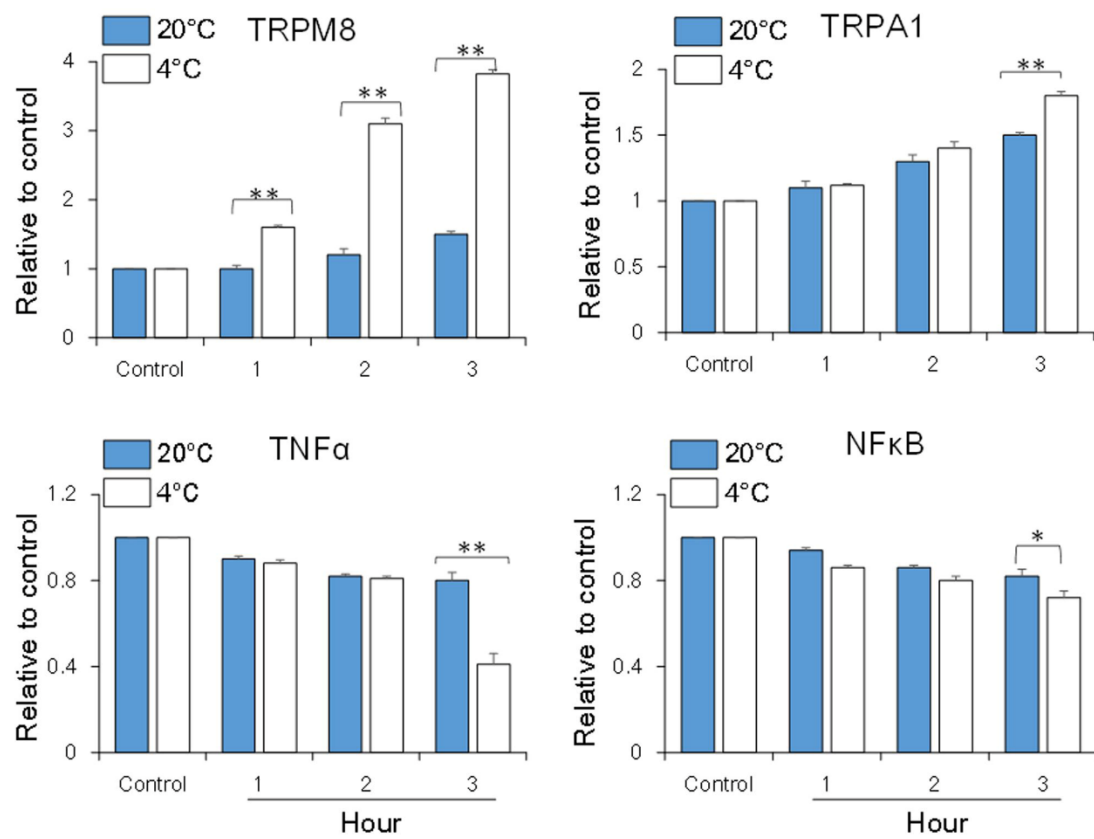

**Figure S1.** Comparison of the mRNA expressions of TRPM8, TRPA1, TNF $\alpha$  and NF $\kappa$ B of PC12 cells in between 20 °C and 4 °C conditions. Data are shown as the mean  $\pm$  S.D. from three independent experiments. \*,  $P < 0.05$ ; \*\*,  $P < 0.01$ .

Figure S2

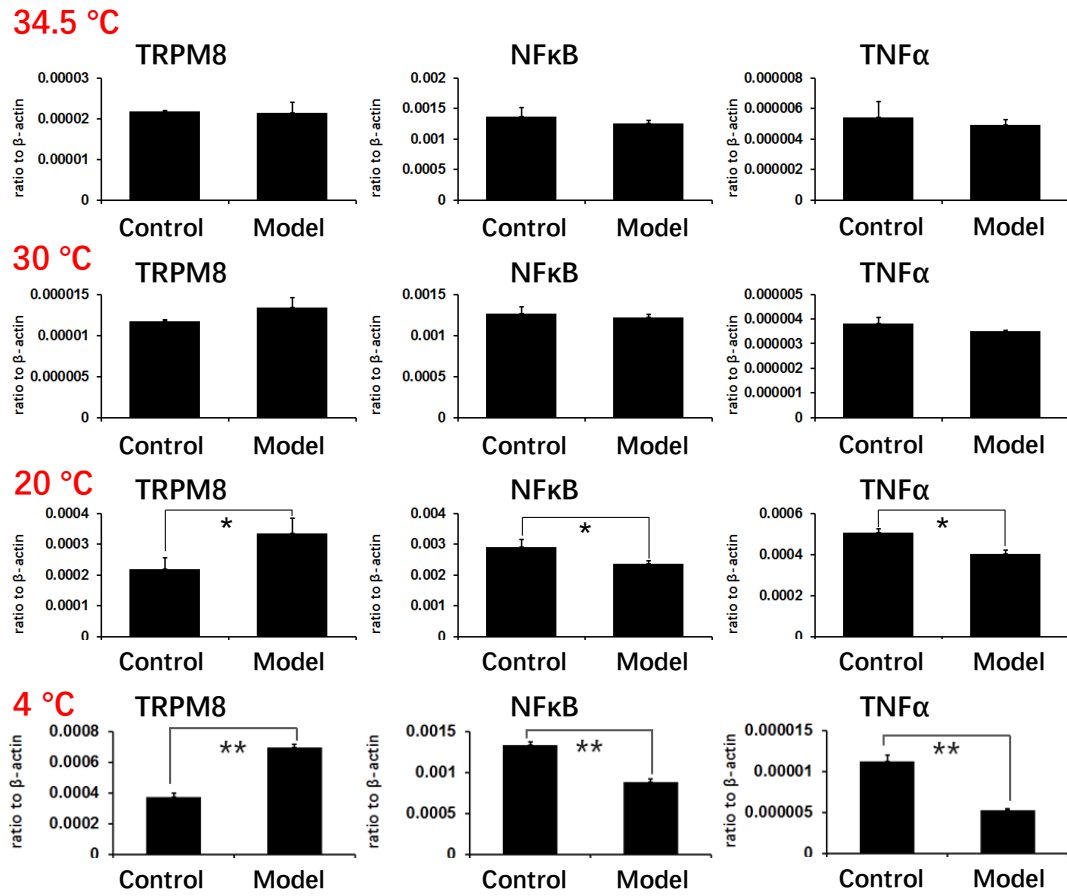

**Figure S2.** The mRNA expressions of TRPM8, NFκB and TNFα in PC12 cells under different temperature *in vitro*. Control: 37 °C. Model: Cold conditions. Data are shown as the mean ± S.D. from three independent experiments. \*,  $P < 0.05$ ; \*\*,  $P < 0.01$ .

**Figure S3**

**Hot (ICR mice)**

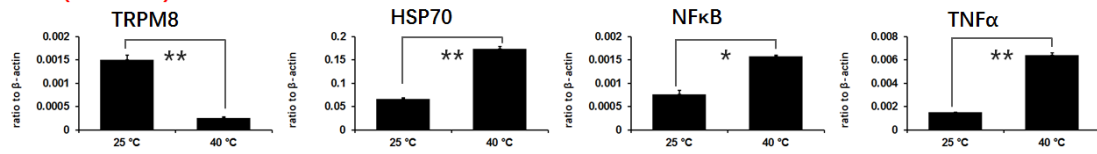

**Hot (PC12 cell)**

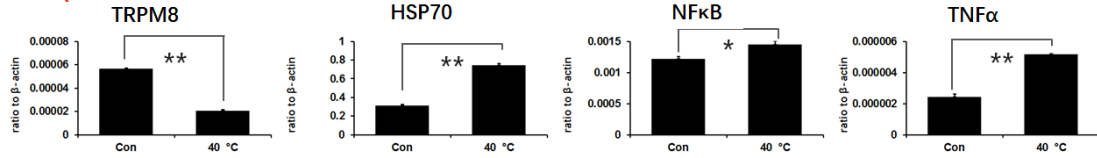

**Figure S3.** The mRNA expressions of TRPM8, HSP70, NFκB and TNFα in heat stress (40 °C) both *in vivo* and *in vitro*. Data are shown as the mean ± S.D. from five mice in each group *in vivo* and three independent experiments *in vitro*. \*,  $P < 0.05$ ; \*\*,  $P < 0.01$ .

**Figure S4**

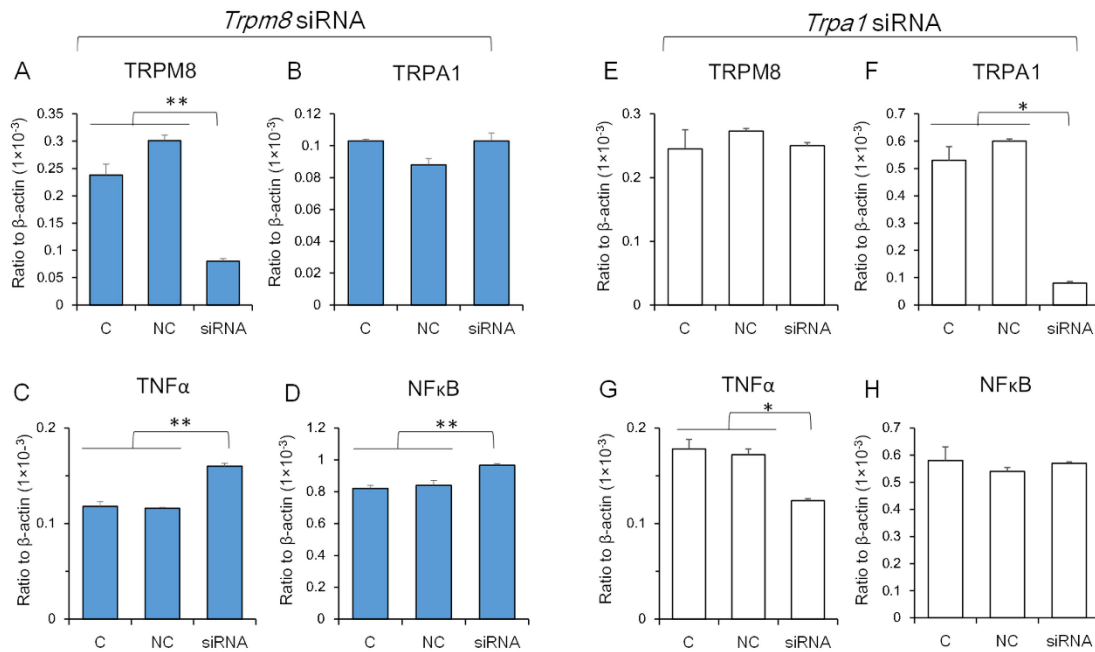

**Figure S4.** Effect of *Trpm8*siRNA and *Trpa1*siRNA (siRNA) on the mRNA expressions of TRPM8, TRPA1, TNFα and NFκB in PC12 cells in normal conditions (37 °C). (A) - (D): *Trpm8*siRNA. (E) - (H): *Trpa1*siRNA. Data are shown as the mean ± S.D. from three independent experiments. \*,  $P < 0.05$ ; \*\*,  $P < 0.01$ .

**Figure S5**

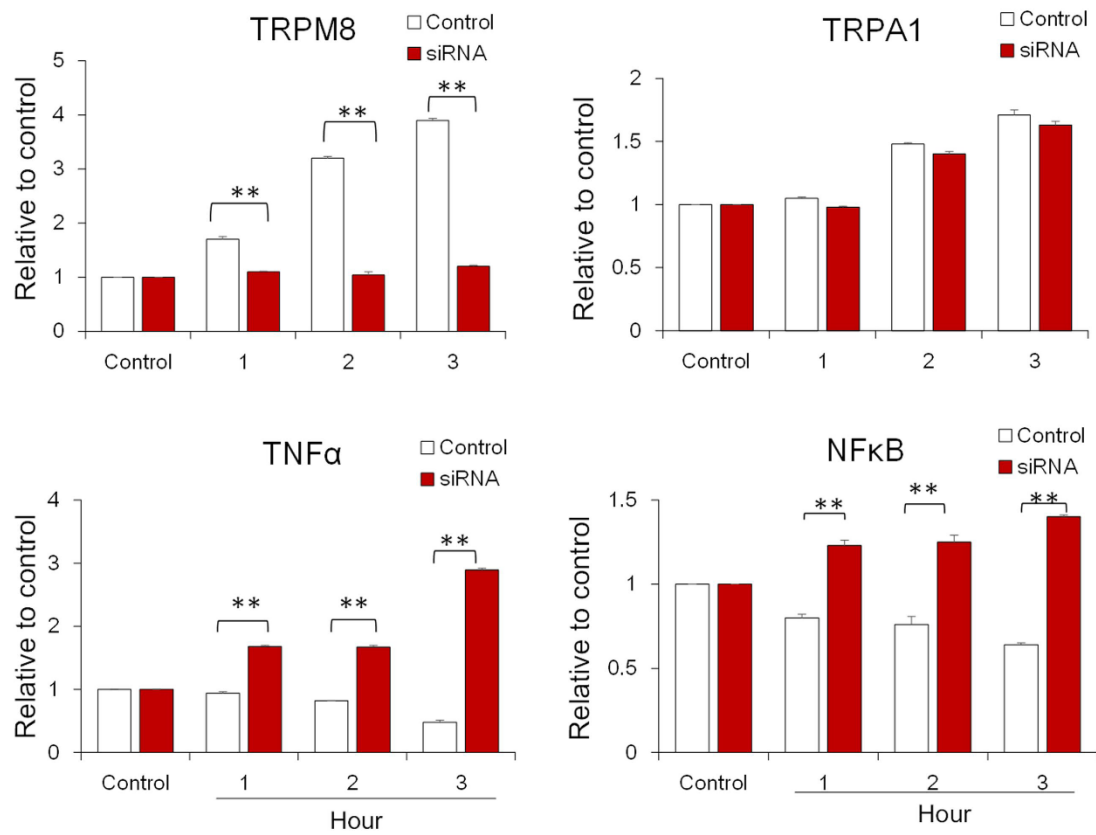

**Figure S5.** Effect of *Trpm8*siRNA (siRNA) on the mRNA expressions of TRPM8, TRPA1, TNF $\alpha$  and NF $\kappa$ B in PC12 cells in cold conditions (4 °C). Data are shown as the mean  $\pm$  S.D. from three independent experiments. \*\*,  $P < 0.01$ .

**Figure S6**

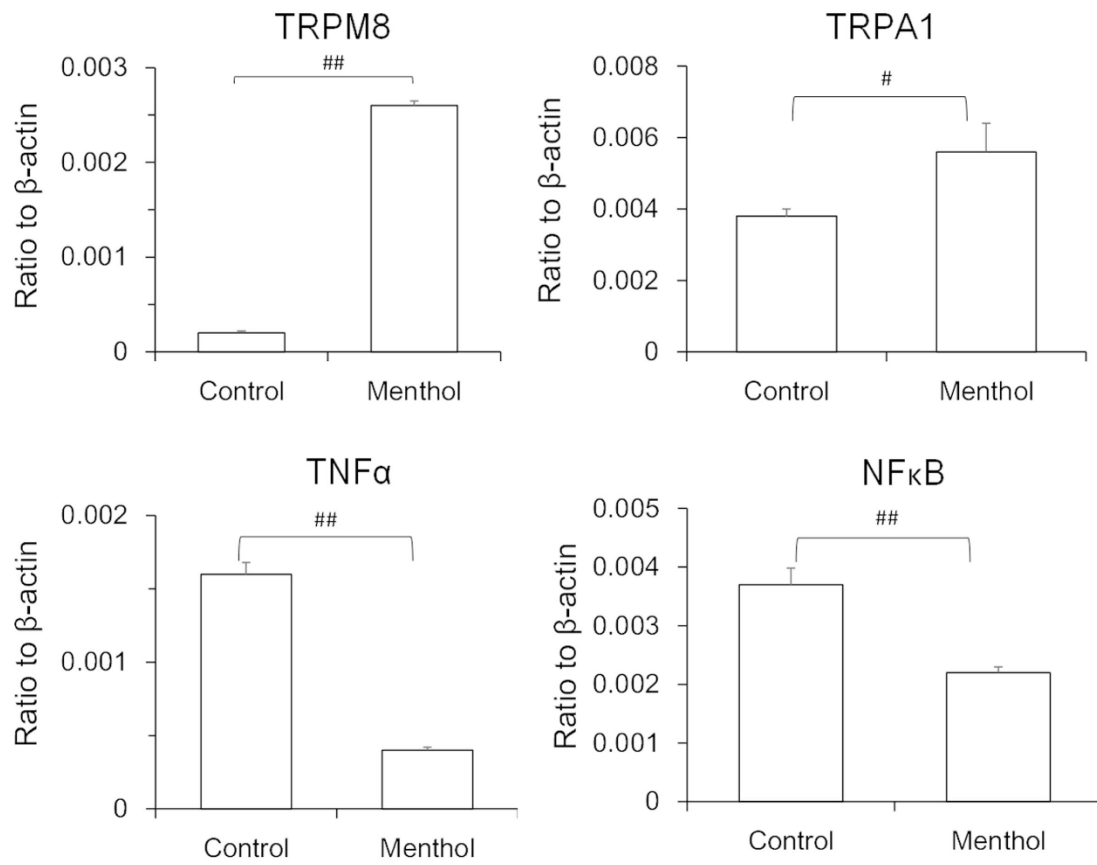

**Figure S6.** Effect of menthol on the mRNA expressions of TRPM8, TRPA1, TNF $\alpha$  and NF $\kappa$ B in PC12 cells. Data are shown as the mean  $\pm$  S.D. from three independent experiments. #,  $P < 0.05$ ; ##,  $P < 0.01$ .

**Figure S7**

**CIR (ICR mice)**

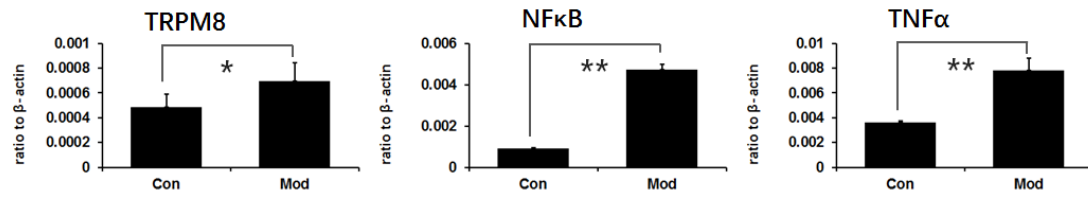

**OGD (PC12 cell)**

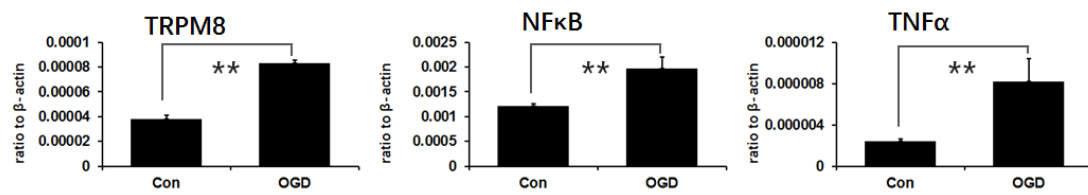

**Figure S7.** The mRNA expressions of TRPM8, NFκB and TNFα in ischemia and reperfusion stress under normal conditions (*in vivo*: room temperature, *in vitro*: 37 °C). Con represents control, Mod means model. CIR: cerebral ischemia and reperfusion, OGD: oxygen and glucose deprivation. Data are shown as the mean ± S.D. from five mice in each group *in vivo* and three independent experiments *in vitro*. \*,  $P < 0.05$ ; \*\*,  $P < 0.01$ .



**Figure S8**

**Cold (ICR mice)**

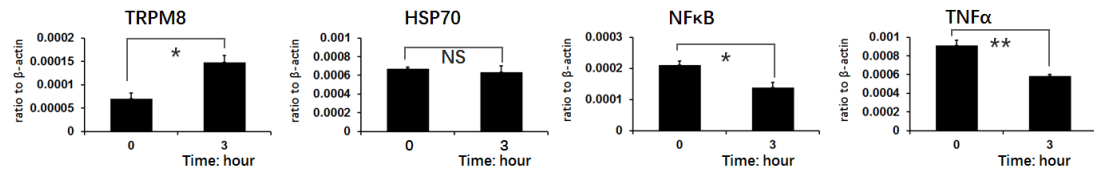

**Cold (PC12)**

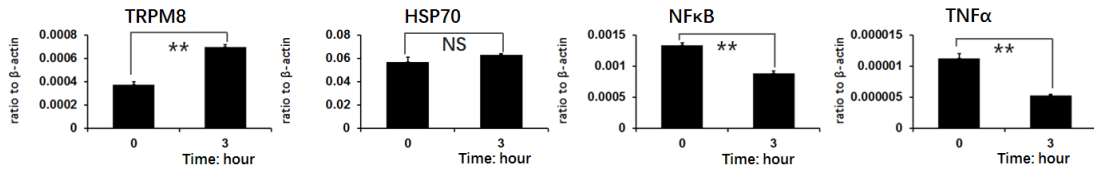

**Figure S8.** The mRNA expressions of TRPM8, HSP70, NFκB and TNFα under cold stress (4 °C) both *in vivo* and *in vitro*. Data are shown as the mean ± S.D. from five mice in each group *in vivo* and three independent experiments *in vitro*. \*, P < 0.05; \*\*, P < 0.01.

**Figure S9**

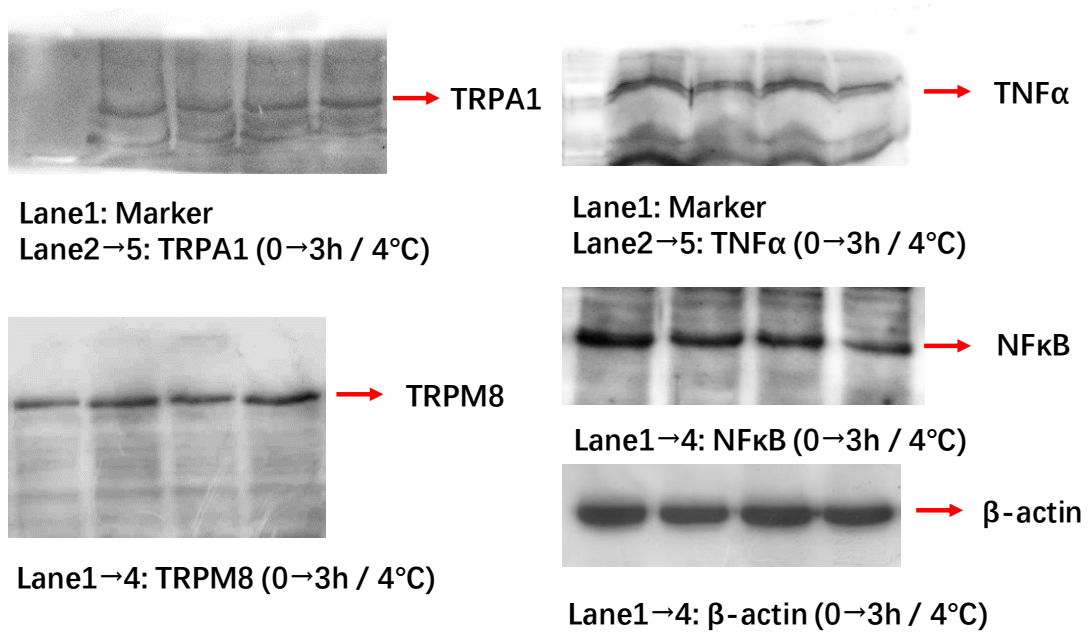

**Figure S9.** Original blots of cropped western blots of Figure 1. The expression levels of TRPM8, TRPA1, NFκB and TNFα in mouse brains under cold conditions.

**Figure S10**

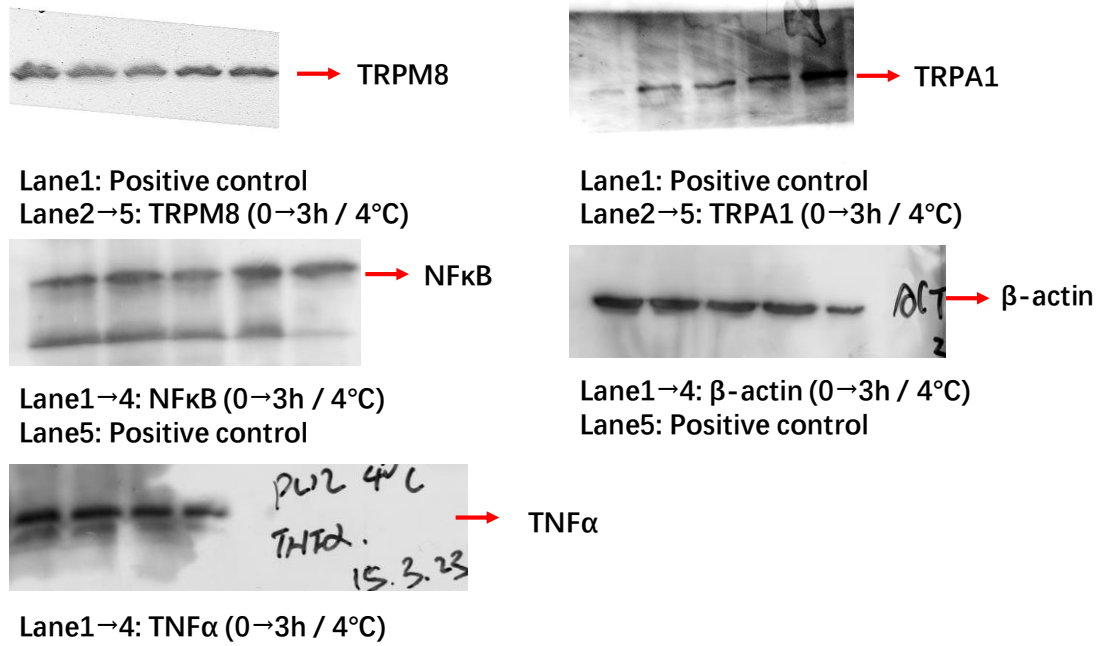

**Figure S10.** Original blots of cropped western blots of Figure 2. Expression of TRPM8, TRPA1, NFκB and TNFα in PC12 cells under cold conditions.

**Figure S11**

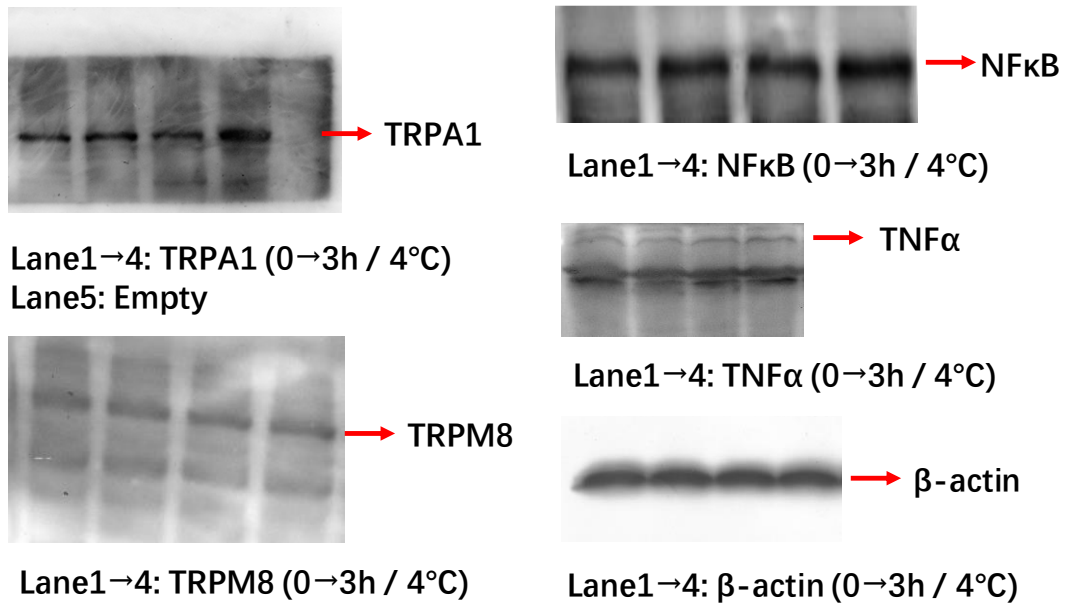

**Figure S11.** Original blots of cropped western blots of Figure 3. Expression of TRPM8, TRPA1, NFκB and TNFα in PC12 cells with Trpm8 knockdown under cold conditions.

## Figure S12

### IP: NFκB (WT)

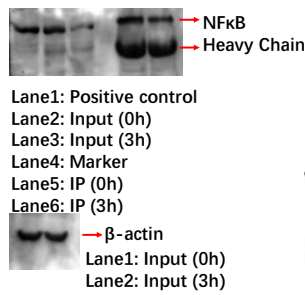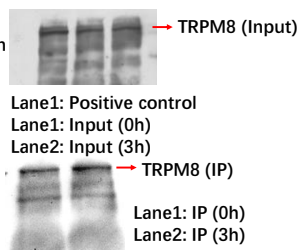

### IP: TRPM8 (WT)

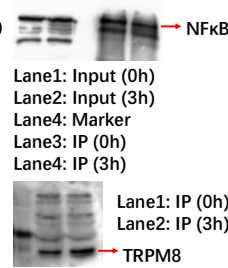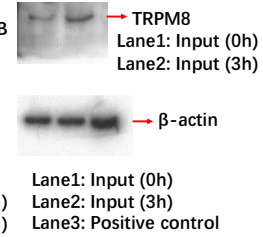

### IP: NFκB (KD)

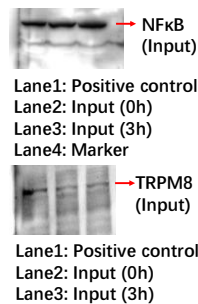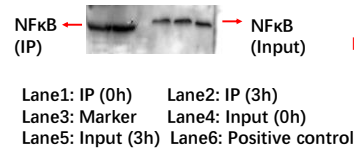

### IP: TRPM8 (KD)

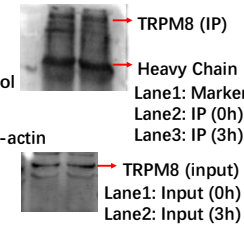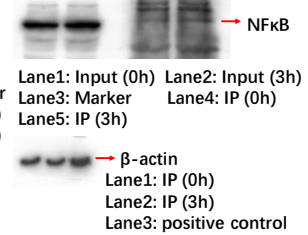

**Figure S12.** Original blots of cropped western blots of Figure 5. Co-immunoprecipitation (CoIP) of endogenous TRPM8 and NFκB using NFκB antibodies and reverse CoIP performed with TRPM8 antibodies in PC12 (WT) and (KD) respectively.

**Figure S13**

**WT**

C-NFκB ←  → N-NFκB

Lane1→4: NFκB in Cytoplasm (0→3 h/ 4°C)

Lane5: Marker

Lane6→9: NFκB in Nucleus (0→3 h/ 4°C)

β-actin ← 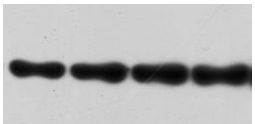 Lane1→4: β-actin (0→3 h/ 4°C)

**KD**

C-NFκB ←  Lane1→4: NFκB in Cytoplasm (0→3 h/ 4°C)

N-NFκB ←  Lane1→4: NFκB in Nucleus (0→3 h/ 4°C)

β-actin ← 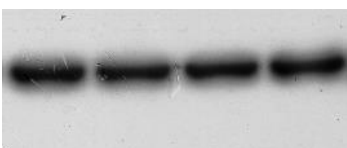 Lane1→4: β-actin (0→3 h/ 4°C)

**Figure S13.** Original blots of cropped western blots of Figure 6. Protein expression of NFκB in PC12 cells under cold conditions (4 °C).

**Figure S14**

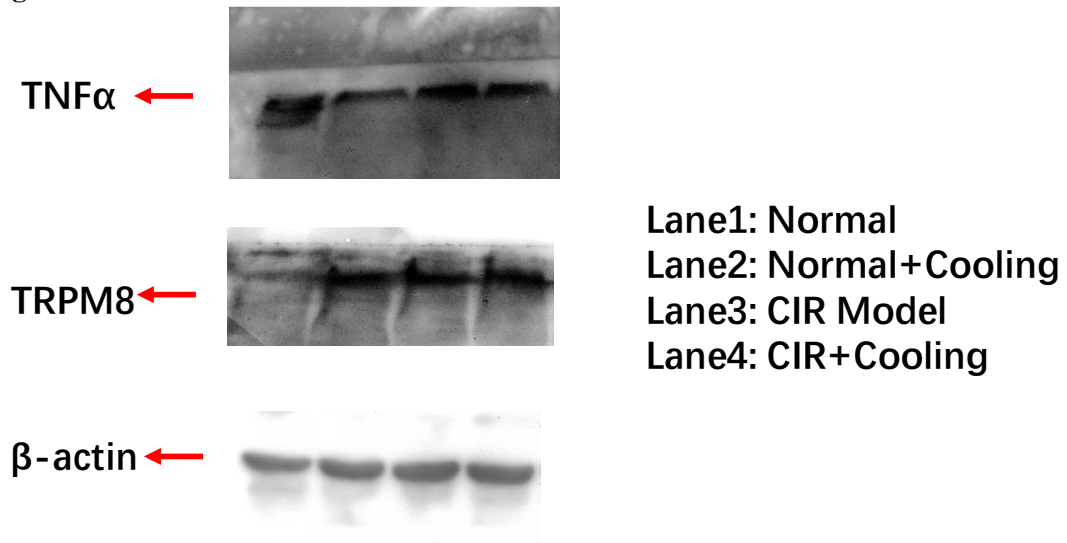

**Figure S14.** Original blots of cropped western blots of Figure 7. Protein expression of TRPM8 and TNF $\alpha$  in mouse brain with cerebral ischemia-reperfusion (CIR)..

**Table S1**

Table S1 Primer for mouse

| <b>Gene</b>    | <b>Sense</b>            | <b>Anti-sense</b>     |
|----------------|-------------------------|-----------------------|
| TRPM8          | TATGAGACCCGAGCAGTGGA    | CAGGCTGAGCGATGAAATGC  |
| TRPA1          | GTCCAGGGCGTTGTCTATCG    | CGTGATGCAGAGGACAGAGAT |
| NF $\kappa$ B  | GGAGGCATGTTCCGGTAGTGG   | CCCTGCGTTGGATTCGTG    |
| TNF $\alpha$   | CCCTCACACTCAGATCATCTTCT | GCTACGACGTGGGCTACAG   |
| $\beta$ -actin | AGGCCACACAAATAGGGTCC    | TTGTGGACACTGCCCCATTC  |



**Table S2**

Table S2 Primer for PC12 cells (rat)

| <b>Gene</b> | <b>Sense</b>             | <b>Anti-sense</b>      |
|-------------|--------------------------|------------------------|
| TRPM8       | TCATACCCACCTGCTGCTTG     | CCTGGGCAAAACACACGATG   |
| TRPA1       | GCAGCATTTTCAGGTGCCAA     | CGCTGTCCAGGCACATCTTA   |
| NFκB        | CGCCTGAGACCCGAGACAAG     | CTGCCTCCTGCTCCACTGAC   |
| TNFα        | CTCCAGCTGGAAGACTCCTCCCAG | CCCGACTACGTGCTCCTCACC  |
| β-actin     | CCGTAAAGACCTCTATGCCAACA  | CGGACTCATCGTACTCCTGCTT |
